# Supplementary material for: Regulation of Free Fatty Acid Receptor 4 on Inflammatory Gene Induced by LPS in Large Yellow Croaker (Larimichthys crocea)
Source: PubMed Central journal article supplement (PMC8222784; doi:10.3389/fimmu.2021.703914), 2021-06-10
Supplement: DataSheet_1.pdf [file DataSheet_1.pdf]

```

1      GGAGCCGTTT TTCACTCACA GTGGTCAATA GCTCTCAAAA CAACCTTGCA CCATTGGTTT
61     AATACATATT TTATCAATTT ATAACCTACT TATTTATATC TCTCACC AAT TCACATATTG
121    GTAACCTATT TAGCCTACAT TTCACCATCA ATCTACACTG CAATTAGAAA CTTATTCCAA
181    ATATACACAA TTCACATATT AACACAATTC ACATATTAAC TTTTTTTTTT TTTACATCCC
241    ATCTATTTAC ACTGTTATCT GCATCACTTA TTTACATCTC ACACCATGAA TTCACATGGT
301    TAATACATAT TGACACCATA AATCTACATC AATCAAATCA ATGTTTGTCT AAACCTTTCT
361    ACATGTCACA ACATCAAACC AAATATCAGC AGTTGCCAGT CATTACAATA ATTACACACTG
421    TCTACATGCT ATATGGTCTG CTGACCTCCG GGTTTAGCCG TTTCTAACAG TTAGTTAACT
481    GAATGACATT TTATTTTATG TTTCTGTGAC TCTGATACTT TTTCCATAA GCTTACATTG
541    TGAAAAAAGC AGCTGTAAAA TGGTGTATAT GTTTTTTAGA GCATCAAAAC CCCTGTGAAA
601    TATCTTTTTT TTTTATTAGA TAGATTAGAT ATTAGATTTT TTTAGGATT CAGAATAAAT
661    AAAAATAAAT AAAAAAACAT TAAAAAGACA ATATCTTAAT ATTCAATATA TGAAATGTGT
721    AAATGCATAT TGTATATTA CAGTATATGC GAAATATTC TAAACACTGT TACAATAAAA
781    ATGCAGAAGT ACAGGATTTC ATCATCCCAC TTCATGCTGA ACGGAAAAAT CCATGTGATG
841    TGATATATAAC CTGCAATCTC CCACAGAGGG CGAGAACAAC ACTGACAGAA CAACCTGAAGG
901    GATCTTAACC AAAGACACTA ATACAATTCC TGATCTACTG ACCTTAACAG GTAAACGCAC
961    TTCACTCTTT TTCTTTCTTT TTTTTTCTTT TTTTTTTGAA CAGATTTTGA ACAACTTTTG
1021   CTTTGGGGCCA TTTTAACGGT AACACTGAGC GTAGTTTGGG ACGTGATATG ATTATAGGAT
1081   AGCTTCTTTA CTCTTCTGCC TGTCTATGTA TTAATATGG CAGTTTTTCT AGATCATTGT
1141   GTGTTTTTAA TCTCCATCTC ATTCAATTAG TAATTAATTA ATTGAAAAAA AAGTGTTATG
1201   AATTACTGTA GTAGTAGATA GAAGTACTAT AGAAGTAAAA ATGTTAAATC ATTTTATTTT
1261   ATGAAATTA AAGTGTAAA ATTGAAATTC TAGCTGTATT TCCTTAATG TTTCTGATT
1321   CCGTGACACT GAAAATGACT CCCCTGTCTT CCCTGCGGAT CTCTTT

```

**Supplementary Figure 1.** Sequence of large yellow croaker IL1 $\beta$  promoter cloned. The IL1 $\beta$  promoter plasmid (pGL6-IL1 $\beta$ ) contains a 1384bp promoter sequence upstream of the IL1 $\beta$  initiation codon(ATG).

```

1      TAGCTTCACT ATCAAGGCAG CAAGACAAAA CTAATCCCT GACAACTCC AACATTATGA
61     GAAAATATCT AATATCAAAG TTTTATTTCT TTTGGAGCTT ACATGAATCA GTTCAGTAGA
121    CAAGGGCGTAT TCTAATGATA ACAGACAAC TGAATACTCG CATTCTCTCT GAACCCGATG
181    TGATTACAGCA GAACAGTAAA TGTTTCCATG TTTGCTCATC ACTCTCTCTG TGGATTTTTT
241    AGAGACAGAT TTTTTTTTTA TAGTTAGTCT TTGTGAGGCT GACATATTCT GACAAAACCC
301    ATATCTCGGA CGCTTTCCAT AATTTAACTT GATCGTCA CTGTTCCGAT CCCCCTGTTG
361    ATAAATATAT AATTCAAAGT GAAACTCTTT CTGGTAAAAA GTGTAGTCTT TAAATCCAAG
421    ATTACTCAGG CCACCTTAGT CATATTTTTC AGATTGACAA ACCTCAGTAT GTAAATGTG
481    TATAGCCCTT TAAAAACAAG TAAAAACCTT AAGAAAAATG ATAGTAACAG GAGTGCCCA
541    GTAGGTGGTG TCCCTGGAGG CATTACCAG CCCTCATCCA ATCTTAGGAC ATGGCATGTA
601    AAATCTTATT CCAGTCAATC TACTTGAGTG GATGGTAAA AGTAAAAAGC CTTCAATAAA
661    CAGGGGTAT TATGAAATGC ACTGACATCT GTGTCACCTT GGGGAAAAGC AGTGTGCTAA
721    TAAGTTGAAA GGACTGCCTG AACTCACAGT AGAAAAATAC AAATGGGTAA TATTATTGTA
781    TTATTTTAAAT CATTTTATAT GACAAAGTTA AGTATAAGAC ATCGGTATTA AATTGGAACQ
841    ATAATCGGAC CACTAACGGG CTGAAAACCA AGTAGCTGCC AGGAACCCCTG ACAGGCCCTA
901    TGAAGGATTA ACATATTTCT GACTCACAGC TAAACATTGT TATCAATACT GAGATATGAT
961    CTTACAGAAAT GTGGGATGAC GATATGGACA TAAATGATCC ACCTCATGTG TTTATCACTT
1021   CAAATGCTCT GAACAGACCA AAGATAAACT TCATCATTTA GTTTCATGAC TAATATTGGA
1081   AGCGGAAGAT GACACATCAG AAAACAGGCG TAAATTAGAC TTAATTATAG AAACACATTC
1141   CTTACTGTAG ATACATTAGC AGAATAATA TAAAAAAA CCTCTTTGAT GATGATAGCT
1201   ATTGATCATT TCAGCTGGTC ATGTGGGAAA GAATTTCTTA TCTTATCTTA CATTACACGG
1261   GTGCTAATA TAGAAGCAG TTATGTAAT ACTGCAGAAA CCGGAGAGAC AAACTAACCC
1321   CTGTGTGTA TAAAAATCAA GAGCCCAACA TAAATTTGAC TTCTTGTCAI CATTGTATCT
1381   ATACTGATTT TATCATCACA ACCATGCAAA TGAATGGTTT TGCGTGGATT TTCCCTTTAA
1441   ATTAATGGGC TAAAAATATC AGAGGGATTT TTTTTTTTAC ACAATCAGCC TATGTCTATT
1501   TGAAACGTTT GTGTGTGTGT GTGTGTGTGT GTGTGTGTGT GTGTGTGTTA GGAGTTGGGG
1561   CTATTTTATT CTTAAAAATA TCATTTTAAAC TTTATCTTCA TTTTAAATAT AAATGAGGAT
1621   AAAGTCCCGC CTGCTTCCCT TGGTCAATTT GAAGATGGAC ACTCCTCGCC ATCTTCATCA
1681   AAATGAATCA CGGATGCTGG ACCGGATGCT TGACGTTTGA TTCCGGGCCT GTCGTAGAGA
1741   CGTATTGGGA AATCCCTCCA GTCTGAAGAA TATAAAATGA AAGCTCATCG CAAAGAACAA
1801   CACTCCTTCT TGACTCCTGA CAGAACCTCA GCATCAGTGG AAACCTCAAGT CAACTGCTTC
1861   CCACAGCGCA AAC

```

**Supplementary Figure 2.** Sequences of large yellow croaker IL6 promoter cloned. The IL6 promoter plasmid (pGL6-IL6) contains a 1873bp promoter sequence upstream of the IL6 initiation codon(ATG).

A

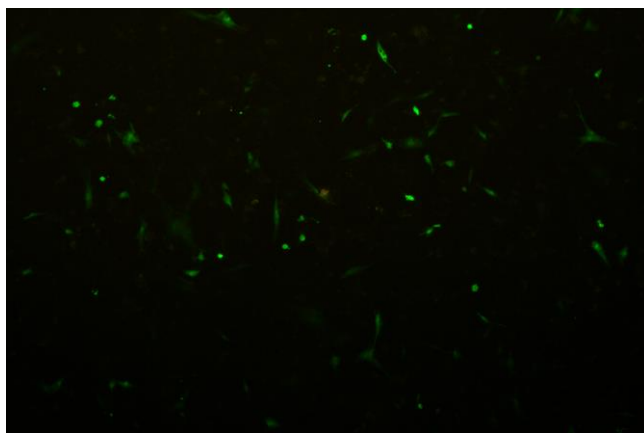

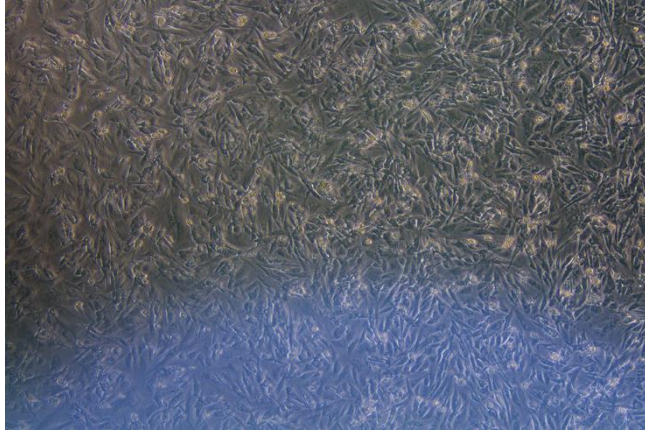

B

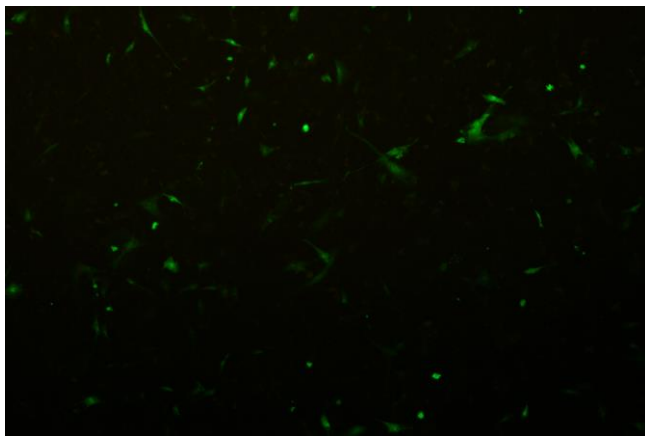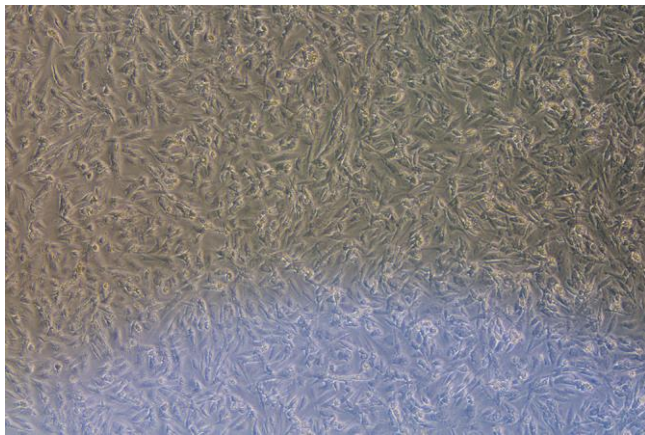

**Supplementary Figure 3.** The overexpression of FFAR4 in large yellow croaker macrophages. After 24h overexpression, the gene expression was observed under a fluorescence microscope. A: pcDNA3.1-EGFP-FFAR4; B: pcDNA3.1-EGFP.
